# Supplementary material for: Alpelisib Exhibits a Synergistic Effect with Pyrotinib and Reverses Acquired Pyrotinib Resistance in HER2+ Breast Cancer
Source: Research Square preprint supplement (doi:10.21203/rs.3.rs-1221004/v1), 2022-01-05
Supplement: Supplementary file 1 [file d0c1d80187152c45ddc8ec33.xlsx]

## Sheet: Sheet1
Primers used for QRT-PCR in experiments
Gene name					sense primer					antisense primer
HER2					TGCAGGGAAACCTGGAACTC					ACAGGGGTGGTATTGTTCAGC
EGFR					AGGCACGAGTAACAAGCTCAC					ATGAGGACATAACCAGCCACC
PIK3CA					TGAAGCACCTGAATAGGCAAGTCG					TCTGGTCGCCTCATTTGCTCAAC
PIK3CB					GAGATTGCAAGCAGTGATAGTG					TAATTTTGGCAGTGATTGTGGG
PIK3CD					GACCCAGAAGTGAACGACTTTC					CCTCAAACTTAACGTTGACCAG
PIK3CG					CACCCAAAAGCATATCCTAAGC					GTAATGCAGAACATCATCGTCC
PIK3R1					CATCGATCATTTCCAAGTCCAC					ACTGAAGCAGATGTTGAACAAC
ADAM10					ATGGGAGGTCAGTATGGGAATC					ACTGCTCTTTTGGCACGCT
ADAM17					GTGGATGGTAAAAACGAAAGCG					GGCTAGAACCCTAGAGTCAGG
EGF					TGTCCACGCAATGTGTCTGAA					CATTATCGGGTGAGGAACAACC
TGF-α					AGGTCCGAAAACACTGTGAGT					AGCAAGCGGTTCTTCCCTTC
HB-EGF					ATCGTGGGGCTTCTCATGTTT					TTAGTCATGCCCAACTTCACTTT
AREG					GTGGTGCTGTCGCTCTTGATA					CCCCAGAAAATGGTTCACGCT
BTC					CTAGGTGCCCCAAGCAATACA					GCAGACACCGATGACCAAAATA
EREG					GTGATTCCATCATGTATCCCAGG					GCCATTCATGTCAGAGCTACACT
EPGN					ATGGCTTTGGGAGTTCCAATATC					TCCTTCTATGTTGTCAGCTTGC
