# Supplementary material for: Alpelisib Exhibits a Synergistic Effect with Pyrotinib and Reverses Acquired Pyrotinib Resistance in HER2+ Breast Cancer
Source: Research Square preprint supplement (doi:10.21203/rs.3.rs-1221004/v1), 2022-01-05
Supplement: Supplementary file 3 [file ee69ad86a090edfbcd9a56d7.xlsx]

## Sheet: Sheet1
Antibodies brands and catelogues used for western blotting experiment
Antibody	catalogue	manufacturer
PI3 Kinase p110α Rabbit mAb	4249T	CST
EGF Receptor Rabbit mAb	4267T	CST
Phospho-EGF Receptor Rabbit mAb	3777T	CST
HER2/ErbB2 (D8F12) XP Rabbit mAb	4290T	CST
Akt（pan） Rabbit pAb	382804	zenbio
Phospho-AKT (Ser473) Rabbit mAb	R22961	zenbio
mTOR Rabbit pAb	380411	zenbio
Phospho-mTOR Rabbit pAb	381557	zenbio
PI3 Kinase p85 alpha Rabbit mAb	R22768	zenbio
β-actin Rabbit pAb	380624	zenbio
β-actin Mouse pAb	200068-8F10	zenbio
Cleaved-caspase-9 Rabbit pAb	381238	zenbio
Cleaved-Caspase-3 p17 Rabbit pAb	380169	zenbio
Cleaved-PARP1 Rabbit pAb	383942	zenbio
Phospho-p70 S6 Kinase (Thr389/Thr412) Antibody Rabbit	AF3228	Affinity
p70 S6 Kinase Antibody Rabbit	AF6226	Affinity
Caspase Rabbit 3/P17/P19 Polyclonal Antibody	19677-1-AP	proteintech
4EBP1 Mouse Monoclonal Antibody	60246-1-Ig	proteintech
Phospho-4E-BP1 (Thr37/46) (236B4) Rabbit mAb	2855T	CST
Phospho-HER2/ErbB2 (Tyr1221/1222) (6B12) Rabbit mAb	2243T	CST
PARP1 Mouse Monoclonal Antibody	66520-1-Ig	proteintech
PI3 Kinase p110δ Rabbit mAb	382122	Zenbio
beta Tubulin Mouse mAb	T200608	Zenbio
IRDye® 800CW Goat anti-Mouse IgG Secondary Antibody	926-32210	LI-COR
IRDye® 680RD Goat anti-Rabbit IgG Secondary Antibody	926-68071	LI-COR
